# Supplementary material for: Peripheral Nervous System Function and Organophosphate Pesticide Use among Licensed Pesticide Applicators in the Agricultural Health Study
Source: PubMed Central journal article supplement (PMC3339452; doi:10.1289/ehp.1103944), 2012-01-19
Supplement: ehp.1103944.s001.pdf [file ehp.1103944.s001.pdf]

## **SUPPLEMENTAL MATERIAL**

### **PERIPHERAL NERVOUS SYSTEM FUNCTION AND ORGANOPHOSPHATE PESTICIDE USE AMONG LICENSED PESTICIDE APPLICATORS IN THE AGRICULTURAL HEALTH STUDY**

Sarah E Starks, Jane A Hoppin, Freya Kamel, Charles F Lynch, Michael P Jones, Michael C  
Alavanja, Dale P Sandler, Fred Gerr

## **TABLE OF CONTENTS**

- Page 2. Supplemental Table 1. Pesticide use among 678 male licensed pesticide applicators.
- Page 3. Supplemental Table 2. Descriptive statistics for neurological physical examination tests, electrophysiological tests and quantitative functional PNS tests among 678 male licensed pesticide applicators.
- Page 4. Supplemental Table 3. Logistic and linear regression base model covariates for peripheral nervous system (PNS) outcome measures.
- Page 5. Supplemental Table 4. Results from dose-response models of neurological physical examination tests among 678 male pesticide applicators.
- Page 8. Supplemental Table 5. Adjusted regression coefficients for quantitative functional PNS tests and pesticide use (ever-use and  $\log_{10}$  lifetime days of use) among 678 male licensed pesticide applicators in the Agricultural Health Study. .

**Supplemental Material, Table 1.** Pesticide use among 678 male licensed pesticide applicators

| Pesticide exposure       | N*  | %    | Mean    | SD      | Min. | Median  | Max.     |
|--------------------------|-----|------|---------|---------|------|---------|----------|
| <b>Organophosphates</b>  |     |      |         |         |      |         |          |
| Acephate                 | 163 | 24.0 | 86.2    | 90.9    | 2.5  | 56.0    | 500.5    |
| Chlorpyrifos             | 406 | 59.9 | 74.3    | 102.6   | 2.0  | 38.8    | 767.3    |
| Coumaphos                | 90  | 13.3 | 76.1    | 250.6   | 1.0  | 10.3    | 1,682.5  |
| Diazinon                 | 294 | 43.4 | 55.6    | 94.1    | 1.0  | 20.9    | 846.0    |
| Dichlorvos               | 123 | 18.1 | 454.0   | 1,083.5 | 1.0  | 56.0    | 8,680.0  |
| Dimethoate               | 64  | 9.4  | 47.1    | 69.2    | 2.0  | 24.5    | 457.3    |
| Disulfoton               | 107 | 15.8 | 42.9    | 42.1    | 2.0  | 24.5    | 236.0    |
| Ethoprop                 | 119 | 17.6 | 45.5    | 49.8    | 2.5  | 24.5    | 316.0    |
| Fonofos                  | 195 | 28.8 | 63.6    | 82.3    | 2.0  | 38.8    | 457.3    |
| Malathion                | 525 | 77.4 | 99.8    | 203.8   | 2.0  | 37.0    | 2,625.0  |
| Parathion                | 143 | 21.1 | 103.3   | 274.9   | 1.0  | 20.0    | 1,667.5  |
| Phorate                  | 218 | 32.2 | 71.7    | 132.6   | 2.0  | 27.0    | 1,627.5  |
| Phosmet                  | 99  | 14.6 | 61.6    | 83.7    | 2.5  | 27.3    | 600.0    |
| Tebupirimfos             | 64  | 9.4  | 50.7    | 47.0    | 4.0  | 39.5    | 250.0    |
| Terbufos                 | 344 | 50.7 | 100.6   | 116.1   | 2.0  | 56.0    | 752.3    |
| Tetrachlorvinphos        | 66  | 9.7  | 66.7    | 100.9   | 3.0  | 24.5    | 581.6    |
| <b>Carbamates</b>        |     |      |         |         |      |         |          |
| Aldicarb                 | 127 | 18.7 | 88.7    | 119.0   | 2.0  | 29.5    | 742.3    |
| Benomyl                  | 112 | 16.5 | 63.7    | 123.7   | 1.0  | 15.4    | 767.3    |
| Carbaryl                 | 430 | 63.4 | 103.4   | 153.2   | 1.0  | 47.5    | 1,387.5  |
| Carbofuran               | 281 | 41.5 | 56.3    | 93.1    | 1.0  | 24.5    | 752.3    |
| <b>Summary variables</b> |     |      |         |         |      |         |          |
| All organophosphates     | 661 | 97.5 | 423.6   | 671.9   | 2.0  | 240.8   | 8,763.3  |
| All pesticides           | 677 | 99.9 | 1,619.5 | 1,634.4 | 10.0 | 1,045.5 | 11,676.8 |
| HPEEs (ever)**           | 158 | 23.3 | --      | --      | --   | --      | --       |

\* Number of participants who reported ever-use.

\*\* HPEEs, high pesticide exposure events

**Supplemental Material, Table 2.** Descriptive statistics for neurological physical examination tests, electrophysiological tests and quantitative functional PNS tests among 678 male licensed pesticide applicators

| Outcome                                  | Abnormal |     |      | Mean | SD   | Min. | Max. |
|------------------------------------------|----------|-----|------|------|------|------|------|
|                                          | N        | N   | %    |      |      |      |      |
| <b>Neurological physical examination</b> |          |     |      |      |      |      |      |
| Ankle reflex                             | 663      | 109 | 16.4 | --   | --   | --   | --   |
| Postural tremor                          | 664      | 117 | 17.6 | --   | --   | --   | --   |
| Romberg                                  | 645      | 59  | 9.2  | --   | --   | --   | --   |
| Tandem gait                              | 641      | 180 | 28.1 | --   | --   | --   | --   |
| Toe proprioception                       | 665      | 62  | 9.3  | --   | --   | --   | --   |
| Toe vibration                            | 664      | 120 | 18.1 | --   | --   | --   | --   |
| <b>Electrophysiological tests*</b>       |          |     |      |      |      |      |      |
| Distal motor amplitude (mV)              | 665      | --  | --   | 4.9  | 2.6  | 0.0  | 13.9 |
| Distal motor latency (ms)                | 656      | --  | --   | 5.1  | 0.9  | 3.3  | 9.3  |
| Nerve conduction velocity (m/s)          | 653      | --  | --   | 44.1 | 4.4  | 25.0 | 56.8 |
| Short F-wave latency (ms)                | 545      | --  | --   | 53.0 | 5.0  | 42.1 | 77.9 |
| <b>Quantitative functional PNS tests</b> |          |     |      |      |      |      |      |
| <b>Hand strength (kg)</b>                |          |     |      |      |      |      |      |
| Grip, d.                                 | 666      | --  | --   | 38.2 | 9.6  | 9.6  | 72.9 |
| Grip, nd.                                | 668      | --  | --   | 38.2 | 9.9  | 8.7  | 70.9 |
| Key pinch, d.                            | 665      | --  | --   | 10.9 | 2.0  | 1.3  | 16.5 |
| Key pinch, nd.                           | 667      | --  | --   | 10.8 | 2.1  | 2.7  | 19.7 |
| Palmar pinch, d.                         | 665      | --  | --   | 9.9  | 2.3  | 0.7  | 16.7 |
| Palmar pinch, nd.                        | 667      | --  | --   | 10.1 | 2.4  | 1.1  | 20.3 |
| Sway speed - eyes open (mm/s)            | 655      | --  | --   | 14.6 | 5.1  | 5.0  | 38.6 |
| Sway speed - eyes closed (mm/s)          | 656      | --  | --   | 22.9 | 10.2 | 6.4  | 70.6 |
| Vibrotactile threshold, d. (log $\mu$ )  | 660      | --  | --   | 1.5  | 0.5  | -0.4 | 2.4  |
| Vibrotactile threshold, nd. (log $\mu$ ) | 661      | --  | --   | 1.5  | 0.5  | -1.0 | 2.4  |

d, dominant; nd, non-dominant;  $\mu$ , microns

\* Electrophysiological tests were performed on the peroneal motor nerve.

**Supplemental Material, Table 3.** Logistic and linear regression base model covariates for peripheral nervous system (PNS) outcome measures

| Outcome                                                | N   | Age (yrs)          | BMI (kg/m <sup>2</sup> ) | Height (cm)        | Foot temp. (°C)    | State (N. Carolina) | Model R-square* |
|--------------------------------------------------------|-----|--------------------|--------------------------|--------------------|--------------------|---------------------|-----------------|
| <u>Logistic regression results (odds ratios)</u>       |     |                    |                          |                    |                    |                     |                 |
| Neurological physical examinations                     |     |                    |                          |                    |                    |                     |                 |
| Ankle reflex                                           | 663 | 1.09 <sup>†</sup>  | 1.11 <sup>†</sup>        | --                 | --                 | --                  | --              |
| Postural tremor                                        | 664 | 1.04 <sup>†</sup>  | --                       | --                 | --                 | --                  | --              |
| Romberg                                                | 645 | 1.12 <sup>†</sup>  | --                       | 1.07 <sup>†</sup>  | --                 | 0.43 <sup>†</sup>   | --              |
| Tandem gait                                            | 641 | 1.11 <sup>†</sup>  | --                       | 1.05 <sup>†</sup>  | --                 | --                  | --              |
| Toe proprioception                                     | 665 | 1.03 <sup>†</sup>  | --                       | 1.05 <sup>†</sup>  | --                 | --                  | --              |
| Toe vibration                                          | 664 | 1.09 <sup>†</sup>  | --                       | 1.13 <sup>†</sup>  | --                 | 0.22 <sup>†</sup>   | --              |
| <u>Linear regression results (parameter estimates)</u> |     |                    |                          |                    |                    |                     |                 |
| Electrophysiological tests                             |     |                    |                          |                    |                    |                     |                 |
| Distal motor amplitude (mV)                            | 664 | -0.08 <sup>†</sup> | --                       | -0.08 <sup>†</sup> | -0.33 <sup>†</sup> | 0.60 <sup>†</sup>   | 0.16            |
| Distal motor latency (ms)**                            | 655 | -0.01 <sup>†</sup> | --                       | -0.02 <sup>†</sup> | 0.21 <sup>†</sup>  | 1.06 <sup>†</sup>   | 0.32            |
| Nerve conduction velocity (m/s)                        | 652 | -0.15 <sup>†</sup> | --                       | -0.21 <sup>†</sup> | 0.48 <sup>†</sup>  | -0.37               | 0.24            |
| Short F-wave latency (ms)**                            | 544 | -0.15 <sup>†</sup> | --                       | -0.40 <sup>†</sup> | 0.95 <sup>†</sup>  | 0.12                | 0.36            |
| Quantitative functional PNS tests                      |     |                    |                          |                    |                    |                     |                 |
| Hand strength summary z-score                          | 671 | -0.03 <sup>†</sup> | 0.03 <sup>†</sup>        | 0.02 <sup>†</sup>  | --                 | -0.54 <sup>†</sup>  | 0.40            |
| Sway speed - eyes open (mm/s)**                        | 655 | -0.24 <sup>†</sup> | --                       | -0.19 <sup>†</sup> | --                 | 2.47 <sup>†</sup>   | 0.33            |
| Sway speed - eyes closed (mm/s)**                      | 656 | -0.40 <sup>†</sup> | --                       | -0.42 <sup>†</sup> | --                 | 6.38 <sup>†</sup>   | 0.31            |
| Vibrotactile threshold summary (log $\mu$ )**          | 667 | -0.02 <sup>†</sup> | --                       | -0.02 <sup>†</sup> | --                 | --                  | 0.37            |

\* Model R-square not reported for logistic regression models.

\*\* Scores were multiplied by -1 so that lower scores indicate poorer test results.

<sup>†</sup> p<0.05

**Supplemental Material, Table 4.** Results from dose-response models of neurological physical examination tests among 678 male pesticide applicators

| Lifetime days of use | Ankle reflex<br>(abnormal=109, normal = 554) |              |          | Postural tremor<br>(abnormal = 117, normal = 547) |              |          | Romberg<br>(abnormal = 59, normal = 586) |              |          | Tandem gait<br>(abnormal = 180, normal = 586) |              |          | Toe proprioception<br>(abnormal = 62, normal = 603) |              |          | Toe vibration<br>(abnormal = 120, normal = 554) |              |          |
|----------------------|----------------------------------------------|--------------|----------|---------------------------------------------------|--------------|----------|------------------------------------------|--------------|----------|-----------------------------------------------|--------------|----------|-----------------------------------------------------|--------------|----------|-------------------------------------------------|--------------|----------|
|                      | OR                                           | 95% CI       | p-trend* | OR                                                | 95% CI       | p-trend* | OR                                       | 95% CI       | p-trend* | OR                                            | 95% CI       | p-trend* | OR                                                  | 95% CI       | p-trend* | OR                                              | 95% CI       | p-trend* |
| <b>OPs</b>           |                                              |              |          |                                                   |              |          |                                          |              |          |                                               |              |          |                                                     |              |          |                                                 |              |          |
| <b>Acephate</b>      |                                              |              |          |                                                   |              |          |                                          |              |          |                                               |              |          |                                                     |              |          |                                                 |              |          |
| 0                    | 1.00                                         |              |          | 1.00                                              |              |          | --                                       | --           |          | 1.00                                          |              |          | --                                                  | --           |          | 1.00                                            |              |          |
| ≤ median             | 0.51                                         | (0.24, 1.06) | 0.38     | 1.70                                              | (0.98, 2.96) | 0.34     | --                                       | --           | --       | 0.58                                          | (0.31, 1.07) | 0.06     | --                                                  | --           | --       | 0.45                                            | (0.18, 1.16) | 0.27     |
| > median             | 0.96                                         | (0.45, 2.02) |          | 1.09                                              | (0.56, 2.12) |          | --                                       | --           |          | 0.63                                          | (0.32, 1.24) |          | --                                                  | --           |          | 0.72                                            | (0.25, 2.10) |          |
| <b>Chlorpyrifos</b>  |                                              |              |          |                                                   |              |          |                                          |              |          |                                               |              |          |                                                     |              |          |                                                 |              |          |
| 0                    | 1.00                                         |              |          | 1.00                                              |              |          | 1.00                                     |              |          | 1.00                                          |              |          | 1.00                                                |              |          | 1.00                                            |              |          |
| ≤ median             | 0.93                                         | (0.56, 1.56) | 0.24     | 0.99                                              | (0.61, 1.62) | 0.71     | 1.33                                     | (0.66, 2.65) | 0.16     | 1.21                                          | (0.77, 1.92) | 0.39     | 2.20                                                | (1.13, 4.31) | <0.01    | 1.52                                            | (0.90, 2.57) | 0.23     |
| > median             | 0.70                                         | (0.40, 1.24) |          | 1.11                                              | (0.67, 1.83) |          | 1.68                                     | (0.80, 3.54) |          | 1.22                                          | (0.74, 2.01) |          | 2.56                                                | (1.27, 5.13) |          | 1.36                                            | (0.77, 2.39) |          |
| <b>Coumaphos</b>     |                                              |              |          |                                                   |              |          |                                          |              |          |                                               |              |          |                                                     |              |          |                                                 |              |          |
| 0 days               | 1.00                                         |              |          | 1.00                                              |              |          | --                                       | --           |          | 1.00                                          |              |          | 1.00                                                |              |          | 1.00                                            |              |          |
| ≤ median             | 1.42                                         | (0.58, 3.50) | 0.32     | 0.70                                              | (0.27, 1.84) | 0.93     | --                                       | --           | --       | 1.08                                          | (0.49, 2.40) | 0.88     | 2.16                                                | (0.90, 5.20) | 0.06     | 1.62                                            | (0.73, 3.60) | 0.65     |
| > median             | 1.40                                         | (0.62, 3.18) |          | 1.17                                              | (0.54, 2.53) |          | --                                       | --           |          | 1.04                                          | (0.49, 2.21) |          | 1.91                                                | (0.80, 4.57) |          | 1.01                                            | (0.45, 2.28) |          |
| <b>Diazinon</b>      |                                              |              |          |                                                   |              |          |                                          |              |          |                                               |              |          |                                                     |              |          |                                                 |              |          |
| 0 days               | 1.00                                         |              |          | 1.00                                              |              |          | 1.00                                     |              |          | 1.00                                          |              |          | 1.00                                                |              |          | 1.00                                            |              |          |
| ≤ median             | 1.12                                         | (0.62, 2.00) | 0.22     | 0.42                                              | (0.22, 0.80) | 0.21     | 0.85                                     | (0.40, 1.81) | 0.20     | 1.03                                          | (0.61, 1.73) | 0.67     | 0.52                                                | (0.24, 1.12) | 0.36     | 0.69                                            | (0.37, 1.27) | 0.36     |
| > median             | 1.38                                         | (0.83, 2.30) |          | 0.82                                              | (0.50, 1.33) |          | 0.61                                     | (0.29, 1.30) |          | 1.11                                          | (0.70, 1.75) |          | 0.82                                                | (0.43, 1.58) |          | 1.44                                            | (0.83, 2.50) |          |
| <b>Dichlorvos</b>    |                                              |              |          |                                                   |              |          |                                          |              |          |                                               |              |          |                                                     |              |          |                                                 |              |          |
| 0 days               | 1.00                                         |              |          | 1.00                                              |              |          | 1.00                                     |              |          | 1.00                                          |              |          | 1.00                                                |              |          | 1.00                                            |              |          |
| ≤ median             | 0.90                                         | (0.40, 2.03) | 0.11     | 0.71                                              | (0.32, 1.55) | 0.61     | 1.36                                     | (0.54, 3.44) | 0.87     | 2.50                                          | (1.32, 4.71) | <0.01    | 3.65                                                | (1.80, 7.40) | <0.01    | 1.88                                            | (0.95, 3.70) | 0.02     |
| > median             | 1.93                                         | (0.97, 3.85) |          | 0.93                                              | (0.45, 1.91) |          | 0.81                                     | (0.30, 2.24) |          | 2.10                                          | (1.10, 4.00) |          | 1.93                                                | (0.85, 4.37) |          | 2.00                                            | (1.00, 4.01) |          |
| <b>Dimethoate</b>    |                                              |              |          |                                                   |              |          |                                          |              |          |                                               |              |          |                                                     |              |          |                                                 |              |          |
| 0 days               | --**                                         | --           |          | 1.00                                              |              |          | --                                       | --           |          | --                                            | --           |          | --                                                  | --           |          | --                                              | --           |          |
| ≤ median             | --                                           | --           | --       | 1.85                                              | (0.76, 4.52) | 0.05     | --                                       | --           | --       | --                                            | --           | --       | --                                                  | --           | --       | --                                              | --           | --       |
| > median             | --                                           | --           |          | 1.96                                              | (0.87, 4.45) |          | --                                       | --           |          | --                                            | --           |          | --                                                  | --           |          | --                                              | --           |          |
| <b>Disulfoton</b>    |                                              |              |          |                                                   |              |          |                                          |              |          |                                               |              |          |                                                     |              |          |                                                 |              |          |
| 0 days               | 1.00                                         |              |          | 1.00                                              |              |          | --                                       | --           |          | 1.00                                          |              |          | --                                                  | --           |          | --                                              | --           |          |
| ≤ median             | 0.62                                         | (0.23, 1.71) | 1.00     | 2.33                                              | (1.11, 4.90) | 0.03     | --                                       | --           | --       | 0.68                                          | (0.30, 1.55) | 0.50     | --                                                  | --           | --       | --                                              | --           | --       |
| > median             | 1.11                                         | (0.56, 2.22) |          | 1.68                                              | (0.92, 3.07) |          | --                                       | --           |          | 0.87                                          | (0.46, 1.64) |          | --                                                  | --           |          | --                                              | --           |          |

**Supplemental Table 4 Continued.**

| Lifetime days<br>of use | Ankle reflex<br>(abnormal=109,<br>normal = 554) |              |                      | Postural tremor<br>(abnormal = 117,<br>normal = 547) |              |                      | Romberg<br>(abnormal = 59,<br>normal = 586) |              |                      | Tandem gait<br>(abnormal = 180,<br>normal = 586) |              |                      | Toe proprioception<br>(abnormal = 62,<br>normal = 603) |              |                      | Toe vibration<br>(abnormal = 120,<br>normal = 554) |              |                      |
|-------------------------|-------------------------------------------------|--------------|----------------------|------------------------------------------------------|--------------|----------------------|---------------------------------------------|--------------|----------------------|--------------------------------------------------|--------------|----------------------|--------------------------------------------------------|--------------|----------------------|----------------------------------------------------|--------------|----------------------|
|                         | OR                                              | 95% CI       | p-trend <sup>a</sup> | OR                                                   | 95% CI       | p-trend <sup>a</sup> | OR                                          | 95% CI       | p-trend <sup>a</sup> | OR                                               | 95% CI       | p-trend <sup>a</sup> | OR                                                     | 95% CI       | p-trend <sup>a</sup> | OR                                                 | 95% CI       | p-trend <sup>a</sup> |
| <b>OPs</b>              |                                                 |              |                      |                                                      |              |                      |                                             |              |                      |                                                  |              |                      |                                                        |              |                      |                                                    |              |                      |
| <b>Ethoprop</b>         |                                                 |              |                      |                                                      |              |                      |                                             |              |                      |                                                  |              |                      |                                                        |              |                      |                                                    |              |                      |
| 0 days                  | 1.00                                            |              |                      | 1.00                                                 |              |                      | --                                          | --           |                      | 1.00                                             |              |                      | --                                                     | --           |                      | 1.00                                               |              |                      |
| ≤ median                | 1.36                                            | (0.63, 2.97) | 0.85                 | 1.96                                                 | (0.96, 4.02) | <0.01                | --                                          | --           | --                   | 1.26                                             | (0.60, 2.65) | 0.74                 | --                                                     | --           | --                   | 0.81                                               | (0.28, 2.38) | 0.65                 |
| > median                | 0.83                                            | (0.39, 1.76) |                      | 2.33                                                 | (1.32, 4.13) |                      | --                                          | --           |                      | 0.83                                             | (0.43, 1.60) |                      | --                                                     | --           |                      | 1.30                                               | (0.55, 3.07) |                      |
| <b>Fonofos</b>          |                                                 |              |                      |                                                      |              |                      |                                             |              |                      |                                                  |              |                      |                                                        |              |                      |                                                    |              |                      |
| 0 days                  | 1.00                                            |              |                      | 1.00                                                 |              |                      | 1.00                                        |              |                      |                                                  |              |                      | 1.00                                                   |              |                      | 1.00                                               |              |                      |
| ≤ median                | 1.16                                            | (0.60, 2.23) | 0.05                 | 1.08                                                 | (0.60, 1.93) | 0.76                 | 0.95                                        | (0.41, 2.23) | 0.73                 | 1.24                                             | (0.71, 2.14) | 0.52                 | 2.77                                                   | (1.41, 5.44) | <0.01                | 1.91                                               | (1.05, 3.48) | 0.21                 |
| > median                | 1.81                                            | (1.01, 3.21) |                      | 1.08                                                 | (0.61, 1.91) |                      | 0.86                                        | (0.36, 2.05) |                      | 1.13                                             | (0.65, 1.97) |                      | 3.37                                                   | (1.76, 6.48) |                      | 1.34                                               | (0.71, 2.53) |                      |
| <b>Malathion</b>        |                                                 |              |                      |                                                      |              |                      |                                             |              |                      |                                                  |              |                      |                                                        |              |                      |                                                    |              |                      |
| 0 days                  | 1.00                                            |              |                      | 1.00                                                 |              |                      | 1.00                                        |              |                      | 1.00                                             |              |                      | 1.00                                                   |              |                      | 1.00                                               |              |                      |
| ≤ median                | 1.17                                            | (0.63, 2.18) | 0.14                 | 0.74                                                 | (0.43, 1.28) | 0.80                 | 0.73                                        | (0.34, 1.56) | 0.41                 | 0.85                                             | (0.51, 1.43) | 0.38                 | 1.08                                                   | (0.53, 2.19) | 0.99                 | 1.09                                               | (0.59, 2.01) | 0.33                 |
| > median                | 1.53                                            | (0.84, 2.78) |                      | 1.00                                                 | (0.60, 1.69) |                      | 0.71                                        | (0.33, 1.50) |                      | 0.79                                             | (0.47, 1.32) |                      | 1.02                                                   | (0.50, 2.09) |                      | 1.32                                               | (0.72, 2.41) |                      |
| <b>Parathion</b>        |                                                 |              |                      |                                                      |              |                      |                                             |              |                      |                                                  |              |                      |                                                        |              |                      |                                                    |              |                      |
| 0 days                  | 1.00                                            |              |                      | 1.00                                                 |              |                      | --                                          | --           |                      | 1.00                                             |              |                      | --                                                     | --           |                      | 1.00                                               |              |                      |
| ≤ median                | 0.82                                            | (0.39, 1.72) | 0.89                 | 0.59                                                 | (0.27, 1.28) | 0.66                 | --                                          | --           | --                   | 0.56                                             | (0.28, 1.11) | 0.36                 | --                                                     | --           | --                   | 1.21                                               | (0.57, 2.61) | 0.34                 |
| > median                | 1.01                                            | (0.53, 1.95) |                      | 1.32                                                 | (0.74, 2.38) |                      | --                                          | --           |                      | 0.87                                             | (0.49, 1.55) |                      | --                                                     | --           |                      | 1.37                                               | (0.69, 2.73) |                      |
| <b>Phorate</b>          |                                                 |              |                      |                                                      |              |                      |                                             |              |                      |                                                  |              |                      |                                                        |              |                      |                                                    |              |                      |
| 0 days                  | 1.00                                            |              |                      | 1.00                                                 |              |                      | 1.00                                        |              |                      | 1.00                                             |              |                      | 1.00                                                   |              |                      | 1.00                                               |              |                      |
| ≤ median                | 0.68                                            | (0.30, 1.53) | 0.16                 | 0.76                                                 | (0.37, 1.56) | 0.43                 | 1.27                                        | (0.50, 3.23) | 0.45                 | 1.03                                             | (0.53, 2.00) | 0.78                 | 0.95                                                   | (0.36, 2.53) | 0.02                 | 0.76                                               | (0.36, 1.61) | 0.77                 |
| > median                | 0.70                                            | (0.40, 1.21) |                      | 0.84                                                 | (0.51, 1.40) |                      | 0.73                                        | (0.35, 1.52) |                      | 1.07                                             | (0.67, 1.71) |                      | 2.01                                                   | (1.13, 3.58) |                      | 1.11                                               | (0.66, 1.87) |                      |
| <b>Phosmet</b>          |                                                 |              |                      |                                                      |              |                      |                                             |              |                      |                                                  |              |                      |                                                        |              |                      |                                                    |              |                      |
| 0 days                  | 1.00                                            |              |                      | --                                                   | --           |                      | --                                          | --           |                      | 1.00                                             |              |                      | 1.00                                                   |              |                      | 1.00                                               |              |                      |
| ≤ median                | 2.81                                            | (1.20, 6.63) | <0.01                | --                                                   | --           | --                   | --                                          | --           | --                   | 1.20                                             | (0.50, 2.86) | 0.04                 | 1.66                                                   | (0.61, 4.53) | <0.01                | 0.58                                               | (0.23, 1.46) | 0.53                 |
| > median                | 2.94                                            | (1.29, 6.70) |                      | --                                                   | --           |                      | --                                          | --           |                      | 2.30                                             | (1.07, 4.96) |                      | 4.14                                                   | (1.91, 8.99) |                      | 0.90                                               | (0.39, 2.09) |                      |
| <b>Tebupirimfos</b>     |                                                 |              |                      |                                                      |              |                      |                                             |              |                      |                                                  |              |                      |                                                        |              |                      |                                                    |              |                      |
| 0 days                  | --                                              | --           |                      | 1.00                                                 |              |                      | --                                          | --           |                      | 1.00                                             |              |                      | --                                                     | --           |                      | 1.00                                               |              |                      |
| ≤ median                | --                                              | --           | --                   | 1.69                                                 | (0.70, 4.07) | <0.01                | --                                          | --           | --                   | 0.59                                             | (0.21, 1.69) | 0.65                 | --                                                     | --           | --                   | 0.81                                               | (0.31, 2.14) | 0.74                 |
| > median                | --                                              | --           |                      | 2.75                                                 | (1.23, 6.13) |                      | --                                          | --           |                      | 1.53                                             | (0.64, 3.65) |                      | --                                                     | --           |                      | 0.91                                               | (0.35, 2.38) |                      |

**Supplemental Table 4** Continued.

| Lifetime days of use     | Ankle reflex<br>(abnormal=109, normal = 554) |              |                      | Postural tremor<br>(abnormal = 117, normal = 547) |              |                      | Romberg<br>(abnormal = 59, normal = 586) |              |                      | Tandem gait<br>(abnormal = 180, normal = 586) |              |                      | Toe proprioception<br>(abnormal = 62, normal = 603) |              |                      | Toe vibration<br>(abnormal = 120, normal = 554) |              |                      |
|--------------------------|----------------------------------------------|--------------|----------------------|---------------------------------------------------|--------------|----------------------|------------------------------------------|--------------|----------------------|-----------------------------------------------|--------------|----------------------|-----------------------------------------------------|--------------|----------------------|-------------------------------------------------|--------------|----------------------|
|                          | OR                                           | 95% CI       | p-trend <sup>a</sup> | OR                                                | 95% CI       | p-trend <sup>a</sup> | OR                                       | 95% CI       | p-trend <sup>a</sup> | OR                                            | 95% CI       | p-trend <sup>a</sup> | OR                                                  | 95% CI       | p-trend <sup>a</sup> | OR                                              | 95% CI       | p-trend <sup>a</sup> |
| <b>OPs</b>               |                                              |              |                      |                                                   |              |                      |                                          |              |                      |                                               |              |                      |                                                     |              |                      |                                                 |              |                      |
| <b>Terbufos</b>          |                                              |              |                      |                                                   |              |                      |                                          |              |                      |                                               |              |                      |                                                     |              |                      |                                                 |              |                      |
| 0 days                   | 1.00                                         |              |                      | 1.00                                              |              |                      | 1.00                                     |              |                      | 1.00                                          |              |                      | 1.00                                                |              |                      | 1.00                                            |              |                      |
| ≤ median                 | 0.69                                         | (0.40, 1.21) | 0.44                 | 0.91                                              | (0.57, 1.47) | 0.62                 | 0.99                                     | (0.50, 1.97) |                      | 0.98                                          | (0.62, 1.56) | 0.49                 | 0.89                                                | (0.45, 1.74) | 0.11                 | 0.84                                            | (0.49, 1.47) | 0.48                 |
| > median                 | 1.38                                         | (0.81, 2.35) |                      | 0.88                                              | (0.52, 1.51) |                      | 0.56                                     | (0.24, 1.33) |                      | 1.22                                          | (0.74, 2.01) |                      | 1.75                                                | (0.94, 3.24) |                      | 1.27                                            | (0.72, 2.24) |                      |
| <b>Tetrachlorvinphos</b> |                                              |              |                      |                                                   |              |                      |                                          |              |                      |                                               |              |                      |                                                     |              |                      |                                                 |              |                      |
| 0 days                   | --                                           | --           |                      | 1.00                                              |              |                      | --                                       | --           |                      | --                                            | --           |                      | --                                                  | --           |                      | --                                              | --           |                      |
| ≤ median                 | --                                           | --           | --                   | 1.91                                              | (0.67, 5.44) | 0.51                 | --                                       | --           | --                   | --                                            | --           | --                   | --                                                  | --           | --                   | --                                              | --           | --                   |
| > median                 | --                                           | --           |                      | 1.15                                              | (0.51, 2.58) |                      | --                                       | --           |                      | --                                            | --           |                      | --                                                  | --           |                      | --                                              | --           |                      |
| <b>Carbamates</b>        |                                              |              |                      |                                                   |              |                      |                                          |              |                      |                                               |              |                      |                                                     |              |                      |                                                 |              |                      |
| <b>Aldicarb</b>          |                                              |              |                      |                                                   |              |                      |                                          |              |                      |                                               |              |                      |                                                     |              |                      |                                                 |              |                      |
| 0 days                   | 1.00                                         |              |                      | 1.00                                              |              |                      | --                                       | --           |                      | 1.00                                          |              |                      | --                                                  | --           |                      | 1.00                                            |              |                      |
| ≤ median                 | 0.31                                         | (0.12, 0.84) | 0.03                 | 1.27                                              | (0.65, 2.47) | 0.27                 | --                                       | --           | --                   | 1.12                                          | (0.60, 2.10) | 0.79                 | --                                                  | --           |                      | 1.00                                            | (0.41, 2.40) | 0.71                 |
| > median                 | 0.52                                         | (0.19, 1.39) |                      | 1.40                                              | (0.70, 2.77) |                      | --                                       | --           |                      | 0.83                                          | (0.39, 1.75) |                      | --                                                  | --           | --                   | 1.27                                            | (0.45, 3.56) |                      |
| <b>Benomyl</b>           |                                              |              |                      |                                                   |              |                      |                                          |              |                      |                                               |              |                      |                                                     |              |                      |                                                 |              |                      |
| 0 days                   | 1.00                                         |              |                      | 1.00                                              |              |                      | --                                       | --           |                      | 1.00                                          |              |                      | --                                                  | --           |                      | 1.00                                            |              |                      |
| ≤ median                 | 0.62                                         | (0.26, 1.48) | 0.24                 | 1.56                                              | (0.79, 3.06) | 0.60                 | --                                       | --           | --                   | 0.28                                          | (0.12, 0.68) | 0.13                 | --                                                  | --           |                      | 0.77                                            | (0.27, 2.17) | 0.22                 |
| > median                 | 0.69                                         | (0.29, 1.63) |                      | 1.02                                              | (0.49, 2.12) |                      | --                                       | --           |                      | 0.85                                          | (0.42, 1.72) |                      | --                                                  | --           | --                   | 1.99                                            | (0.83, 4.74) |                      |
| <b>Carbaryl</b>          |                                              |              |                      |                                                   |              |                      |                                          |              |                      |                                               |              |                      |                                                     |              |                      |                                                 |              |                      |
| 0 days                   | 1.00                                         |              |                      | 1.00                                              |              |                      | 1.00                                     |              |                      | 1.00                                          |              |                      | 1.00                                                |              |                      | 1.00                                            |              |                      |
| ≤ median                 | 0.56                                         | (0.32, 0.98) | 0.32                 | 1.23                                              | (0.73, 2.06) | 0.10                 | 0.64                                     | (0.30, 1.36) | 0.77                 | 0.92                                          | (0.57, 1.49) | 0.07                 | 0.65                                                | (0.36, 1.18) | <0.01                | 1.04                                            | (0.60, 1.82) | 0.10                 |
| > median                 | 0.77                                         | (0.46, 1.29) |                      | 1.52                                              | (0.92, 2.51) |                      | 0.91                                     | (0.40, 2.06) |                      | 0.64                                          | (0.39, 1.04) |                      | 0.27                                                | (0.13, 0.57) |                      | 1.82                                            | (0.94, 3.55) |                      |
| <b>Carbofuran</b>        |                                              |              |                      |                                                   |              |                      |                                          |              |                      |                                               |              |                      |                                                     |              |                      |                                                 |              |                      |
| 0 days                   | 1.00                                         |              |                      | 1.00                                              |              |                      | 1.00                                     |              |                      | 1.00                                          |              |                      | 1.00                                                |              |                      | 1.00                                            |              |                      |
| ≤ median                 | 0.79                                         | (0.44, 1.43) | 0.32                 | 0.65                                              | (0.36, 1.17) | 0.56                 | 0.40                                     | (0.17, 0.94) | 0.08                 | 0.71                                          | (0.41, 1.21) | 0.66                 | 1.17                                                | (0.57, 2.39) | 0.10                 | 0.96                                            | (0.54, 1.72) | 0.16                 |
| > median                 | 0.78                                         | (0.45, 1.37) |                      | 1.24                                              | (0.77, 1.99) |                      | 0.59                                     | (0.28, 1.22) |                      | 1.19                                          | (0.75, 1.90) |                      | 1.69                                                | (0.92, 3.10) |                      | 1.51                                            | (0.89, 2.56) |                      |

OR, odds ratio; 95% CI, 95% confidence interval. Ankle reflex models were adjusted for age (years) and BMI (kg/m<sup>2</sup>); postural tremor models were adjusted for age (years); Romberg models were adjusted for age (years), height (cm) and state; Tandem gait models were adjusted for age (years) and height (cm), Toe proprioception models were adjusted for age (years) and height (cm); Toe vibration models were adjusted for age (years), height (cm) and state.

\* Based on the chi-square test for trend.

\*\* Results from models with < 5 exposed cases are not presented.

**Supplemental Table 5.** Adjusted regression coefficients for quantitative functional PNS tests and pesticide use (ever-use and log<sub>10</sub> lifetime days of use) among 678 male licensed pesticide applicators in the Agricultural Health Study

| Exposure                | Hand strength<br>z-score<br>(n=671) |               | Sway speed, eyes open<br>(mm/s)*<br>(n=655) |               | Sway speed, eyes closed<br>(mm/s)*<br>(n=656) |               | Vibrotactile threshold,<br>(log μ)*<br>(n=667) |               |
|-------------------------|-------------------------------------|---------------|---------------------------------------------|---------------|-----------------------------------------------|---------------|------------------------------------------------|---------------|
|                         | β                                   | 95% CI        | β                                           | 95% CI        | β                                             | 95% CI        | β                                              | 95% CI        |
| <u>Organophosphates</u> |                                     |               |                                             |               |                                               |               |                                                |               |
| Acephate                |                                     |               |                                             |               |                                               |               |                                                |               |
| Ever-use                | 0.10                                | (-0.05, 0.24) | 0.53                                        | (-0.40, 1.46) | 1.05                                          | (-0.82, 2.93) | 0.01                                           | (-0.06, 0.08) |
| Lifetime days           | 0.05                                | (-0.03, 0.13) | 0.31                                        | (-0.19, 0.82) | 0.48                                          | (-0.54, 1.50) | 0.00                                           | (-0.04, 0.04) |
| Chlorpyrifos            |                                     |               |                                             |               |                                               |               |                                                |               |
| Ever-use                | 0.10                                | (-0.05, 0.24) | 0.53                                        | (-0.40, 1.46) | 1.05                                          | (-0.82, 2.93) | 0.01                                           | (-0.06, 0.08) |
| Lifetime days           | 0.03                                | (-0.03, 0.09) | -0.23                                       | (-0.60, 0.15) | -0.33                                         | (-1.09, 0.42) | 0.01                                           | (-0.02, 0.05) |
| Coumaphos               |                                     |               |                                             |               |                                               |               |                                                |               |
| Ever-use                | 0.00                                | (-0.15, 0.15) | 0.47                                        | (-0.48, 1.42) | 0.10                                          | (-1.82, 2.02) | 0.00                                           | (-0.09, 0.09) |
| Lifetime days           | -0.01                               | (-0.12, 0.10) | 0.23                                        | (-0.44, 0.90) | 0.36                                          | (-0.99, 1.70) | 0.00                                           | (-0.07, 0.06) |
| Diazinon                |                                     |               |                                             |               |                                               |               |                                                |               |
| Ever-use                | 0.03                                | (-0.07, 0.14) | -0.03                                       | (-0.70, 0.64) | 0.14                                          | (-1.21, 1.49) | -0.01                                          | (-0.07, 0.05) |
| Lifetime days           | 0.03                                | (-0.04, 0.10) | 0.14                                        | (-0.29, 0.58) | 0.37                                          | (-0.50, 1.25) | 0.00                                           | (-0.03, 0.04) |
| Dichlorvos              |                                     |               |                                             |               |                                               |               |                                                |               |
| Ever-use                | -0.02                               | (-0.16, 0.12) | 0.19                                        | (-0.70, 1.08) | -0.84                                         | (-2.64, 0.96) | -0.03                                          | (-0.11, 0.05) |
| Lifetime days           | -0.03                               | (-0.09, 0.04) | 0.19                                        | (-0.23, 0.61) | -0.17                                         | (-1.02, 0.67) | -0.01                                          | (-0.05, 0.02) |
| Dimethoate              |                                     |               |                                             |               |                                               |               |                                                |               |
| Ever-use                | 0.06                                | (-0.11, 0.24) | -0.27                                       | (-1.37, 0.83) | -0.49                                         | (-2.71, 1.72) | 0.04                                           | (-0.07, 0.14) |
| Lifetime days           | 0.02                                | (-0.10, 0.13) | -0.29                                       | (-1.03, 0.45) | -0.71                                         | (-2.20, 0.78) | 0.03                                           | (-0.03, 0.10) |
| Disulfoton              |                                     |               |                                             |               |                                               |               |                                                |               |
| Ever-use                | 0.08                                | (-0.07, 0.23) | -0.08                                       | (-1.05, 0.90) | -1.06                                         | (-3.02, 0.90) | 0.06                                           | (-0.02, 0.14) |
| Lifetime days           | 0.04                                | (-0.05, 0.14) | -0.05                                       | (-0.68, 0.57) | -0.88                                         | (-2.14, 0.37) | 0.02                                           | (-0.03, 0.07) |
| Ethoprop                |                                     |               |                                             |               |                                               |               |                                                |               |
| Ever-use                | -0.03                               | (-0.17, 0.12) | -0.50                                       | (-1.44, 0.44) | -0.83                                         | (-2.72, 1.07) | -0.02                                          | (-0.10, 0.06) |
| Lifetime days           | -0.01                               | (-0.11, 0.08) | -0.35                                       | (-0.96, 0.25) | -0.60                                         | (-1.81, 0.61) | -0.01                                          | (-0.06, 0.04) |
| Fonofos                 |                                     |               |                                             |               |                                               |               |                                                |               |
| Ever-use                | 0.03                                | (-0.09, 0.16) | -0.29                                       | (-1.08, 0.50) | -0.09                                         | (-1.69, 1.51) | -0.02                                          | (-0.09, 0.04) |
| Lifetime days           | 0.01                                | (-0.07, 0.08) | -0.14                                       | (-0.62, 0.33) | 0.01                                          | (-0.95, 0.97) | 0.01                                           | (-0.03, 0.04) |
| Malathion               |                                     |               |                                             |               |                                               |               |                                                |               |
| Ever-use                | 0.10                                | (-0.02, 0.22) | -0.08                                       | (-0.86, 0.69) | 0.53                                          | (-1.03, 2.09) | -0.02                                          | (-0.09, 0.05) |
| Lifetime days           | 0.03                                | (-0.03, 0.10) | -0.24                                       | (-0.63, 0.14) | -0.16                                         | (-0.94, 0.61) | -0.02                                          | (-0.05, 0.02) |
| Parathion               |                                     |               |                                             |               |                                               |               |                                                |               |
| Ever-use                | 0.04                                | (-0.08, 0.17) | 1.09                                        | (0.29, 1.89)  | 1.57                                          | (-0.05, 3.19) | 0.01                                           | (-0.07, 0.08) |
| Lifetime days           | 0.00                                | (-0.08, 0.08) | 0.71                                        | (0.21, 1.21)  | 0.92                                          | (-0.09, 1.93) | 0.01                                           | (-0.04, 0.06) |
| Phorate                 |                                     |               |                                             |               |                                               |               |                                                |               |
| Ever-use                | -0.05                               | (-0.16, 0.06) | 0.31                                        | (-0.41, 1.04) | 0.72                                          | (-0.74, 2.19) | 0.04                                           | (-0.02, 0.10) |
| Lifetime days           | -0.02                               | (-0.09, 0.04) | 0.13                                        | (-0.30, 0.56) | 0.43                                          | (-0.45, 1.30) | 0.03                                           | (-0.01, 0.06) |
| Phosmet                 |                                     |               |                                             |               |                                               |               |                                                |               |
| Ever-use                | 0.23                                | (0.08, 0.39)  | -0.34                                       | (-1.33, 0.64) | 0.52                                          | (-1.45, 2.49) | -0.06                                          | (-0.15, 0.03) |
| Lifetime days           | 0.14                                | (0.05, 0.24)  | -0.34                                       | (-0.93, 0.26) | 0.06                                          | (-1.14, 1.26) | -0.04                                          | (-0.10, 0.01) |
| Tebupirimfos            |                                     |               |                                             |               |                                               |               |                                                |               |
| Ever-use                | -0.09                               | (-0.28, 0.09) | 1.40                                        | (0.24, 2.56)  | 1.19                                          | (-1.16, 3.53) | 0.04                                           | (-0.07, 0.14) |
| Lifetime days           | -0.05                               | (-0.16, 0.06) | 0.82                                        | (0.10, 1.53)  | 0.73                                          | (-0.72, 2.18) | 0.03                                           | (-0.03, 0.09) |
| Terbufos                |                                     |               |                                             |               |                                               |               |                                                |               |
| Ever-use                | 0.06                                | (-0.04, 0.17) | 0.05                                        | (-0.73, 0.62) | -1.07                                         | (-2.43, 0.29) | 0.02                                           | (-0.04, 0.08) |
| Lifetime days           | 0.04                                | (-0.02, 0.09) | -0.10                                       | (-0.46, 0.26) | -0.57                                         | (-1.29, 0.15) | 0.00                                           | (-0.03, 0.03) |

**Table 5. Continued.**

| Exposure                        | Hand strength<br>z-score<br>(n=671) |               | Sway speed, eyes open<br>(mm/s)*<br>(n=655) |               | Sway speed, eyes closed<br>(mm/s)*<br>(n=657) |               | Vibrotactile threshold,<br>(log $\mu$ )*<br>(n=667) |               |
|---------------------------------|-------------------------------------|---------------|---------------------------------------------|---------------|-----------------------------------------------|---------------|-----------------------------------------------------|---------------|
|                                 | $\beta$                             | 95% CI        | $\beta$                                     | 95% CI        | $\beta$                                       | 95% CI        | $\beta$                                             | 95% CI        |
| <b>Tetrachlorvinphos</b>        |                                     |               |                                             |               |                                               |               |                                                     |               |
| Ever-use                        | 0.10                                | (-0.08, 0.27) | -0.19                                       | (-1.32, 0.94) | -0.98                                         | (-3.26, 1.31) | -0.01                                               | (-0.11, 0.09) |
| Lifetime days                   | 0.05                                | (-0.06, 0.15) | -0.09                                       | (-0.78, 0.61) | -0.39                                         | (-1.79, 1.01) | 0.00                                                | (-0.06, 0.06) |
| <b>Carbamates</b>               |                                     |               |                                             |               |                                               |               |                                                     |               |
| <b>Aldicarb</b>                 |                                     |               |                                             |               |                                               |               |                                                     |               |
| Ever-use                        | -0.01                               | (-0.16, 0.13) | 0.99                                        | (0.07, 1.91)  | 2.47                                          | (0.62, 4.32)  | 0.11                                                | (0.04, 0.19)  |
| Lifetime days                   | -0.01                               | (-0.08, 0.09) | 0.62                                        | (0.09, 1.16)  | 1.17                                          | (0.10, 2.24)  | 0.05                                                | (0.01, 0.10)  |
| <b>Benomyl</b>                  |                                     |               |                                             |               |                                               |               |                                                     |               |
| Ever-use                        | 0.04                                | (-0.10, 0.19) | 0.61                                        | (-0.33, 1.54) | 1.39                                          | (-0.50, 3.28) | 0.04                                                | (-0.04, 0.12) |
| Lifetime days                   | 0.00                                | (-0.10, 0.09) | 0.33                                        | (-0.28, 0.95) | 0.32                                          | (-0.91, 1.55) | 0.02                                                | (-0.03, 0.08) |
| <b>Carbaryl</b>                 |                                     |               |                                             |               |                                               |               |                                                     |               |
| Ever-use                        | 0.04                                | (-0.08, 0.16) | -0.43                                       | (-1.18, 0.32) | 0.23                                          | (-1.30, 1.76) | -0.04                                               | (-0.10, 0.03) |
| Lifetime days                   | 0.04                                | (-0.02, 0.11) | -0.13                                       | (-0.55, 0.30) | 0.34                                          | (-0.52, 1.21) | -0.01                                               | (-0.04, 0.03) |
| <b>Carbofuran</b>               |                                     |               |                                             |               |                                               |               |                                                     |               |
| Ever-use                        | 0.04                                | (-0.06, 0.15) | 0.27                                        | (-0.39, 0.93) | 0.17                                          | (-1.17, 1.50) | 0.02                                                | (-0.04, 0.08) |
| Lifetime days                   | 0.04                                | (-0.03, 0.10) | 0.04                                        | (-0.38, 0.46) | -0.27                                         | (-1.11, 0.57) | 0.02                                                | (-0.02, 0.06) |
| <b>Summary variables</b>        |                                     |               |                                             |               |                                               |               |                                                     |               |
| Lifetime days to ALL OPs        | 0.01                                | (-0.06, 0.07) | 0.13                                        | (-0.34, 0.61) | 0.20                                          | (-0.76, 1.16) | 0.02                                                | (-0.03, 0.06) |
| Lifetime days to ALL pesticides | 0.06                                | (-0.04, 0.17) | 0.22                                        | (-0.45, 0.89) | 0.29                                          | (-1.06, 1.64) | 0.03                                                | (-0.03, 0.09) |
| HPEEs (ever)                    | 0.14                                | (0.02, 0.26)  | 0.37                                        | (-0.40, 1.14) | 0.96                                          | (-0.60, 2.51) | 0.01                                                | (-0.06, 0.08) |

HPEEs, high pesticide exposure events. Hand strength models were adjusted for age (years), BMI ( $\text{kg}/\text{m}^2$ ), height (cm) and state; sway speed models (with both eyes open and closed) were adjusted for age (years), height (cm) and state; vibrotactile threshold models were adjusted for age (years) and height (cm).

\* Scores have been multiplied by -1 so that lower scores indicate poorer test performance.
